# Supplementary material for: The extended recovery ring-stage survival assay provides a superior association with patient clearance half-life and increases throughput
Source: Springer Nature journal article supplement (doi:10.1186/s12936-020-3139-6), 2020-01-31
Supplement: MOESM1 [file 17614348]

|         | Sequence                  |
|---------|---------------------------|
| Forward | GGGTGATGTTGTAAGAGAACCA    |
| Reverse | ACGAACAAGCCATTTGATATTACAC |

Cycling conditions:

95° C 20 seconds

95° C 1 second

62.3 ° C 30 seconds

65° C 15 seconds
