# Supplementary material for: The extended recovery ring-stage survival assay provides a superior association with patient clearance half-life and increases throughput
Source: Springer Nature journal article supplement (doi:10.1186/s12936-020-3139-6), 2020-01-31

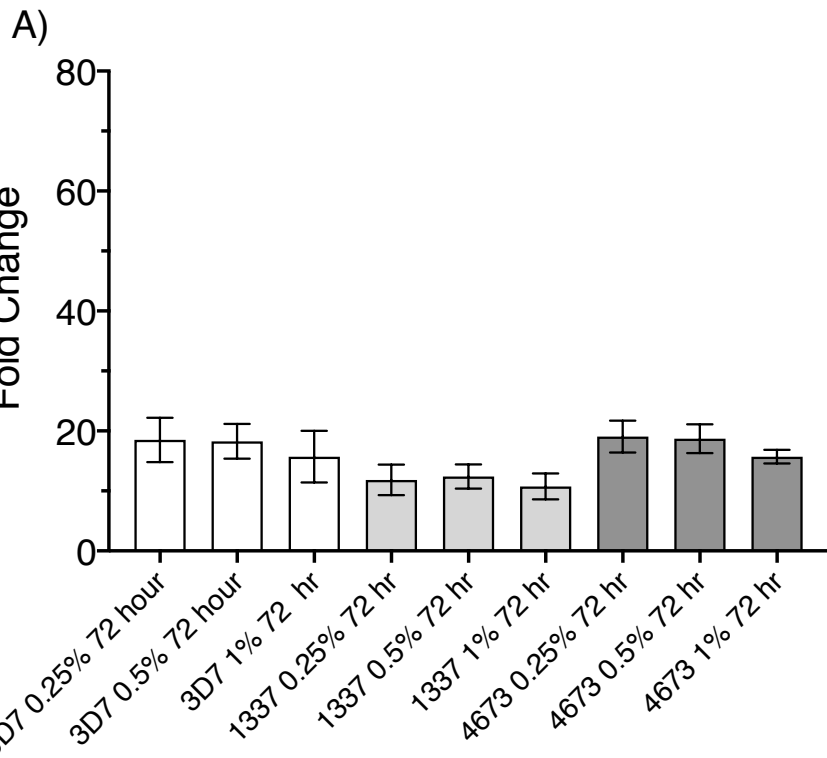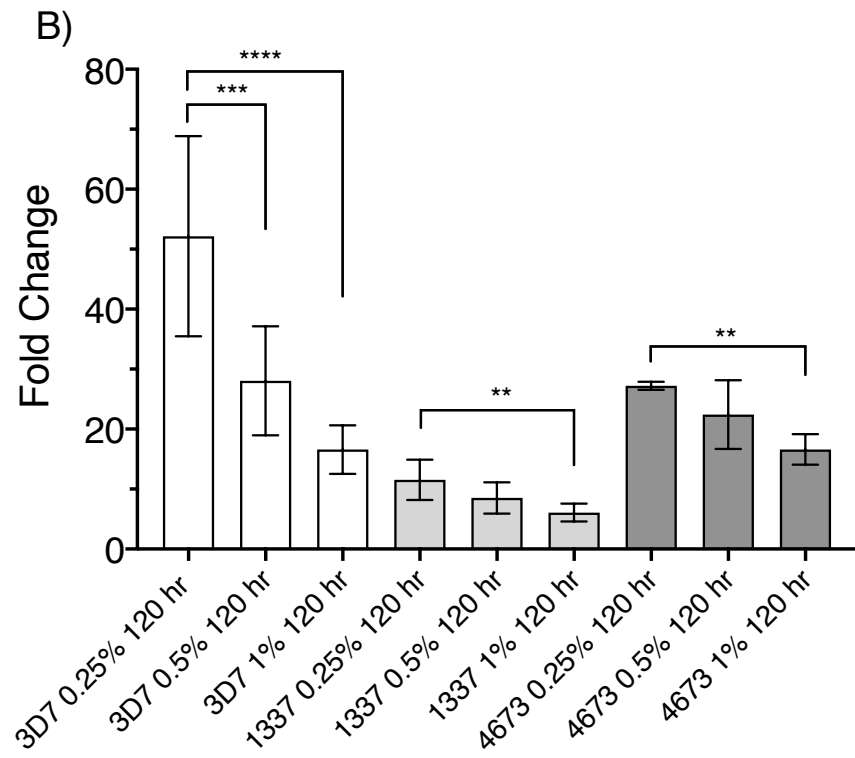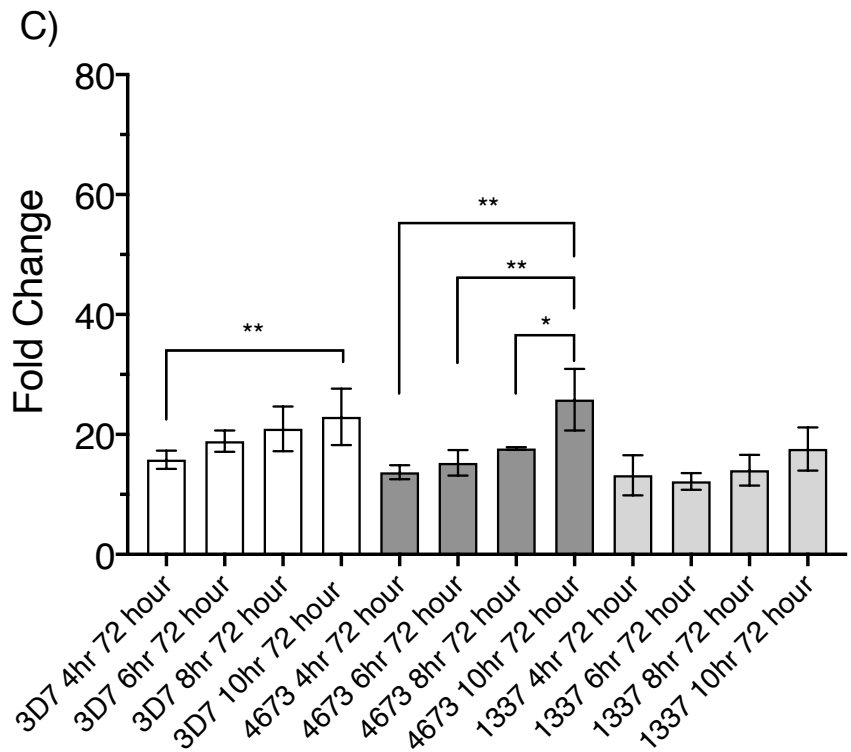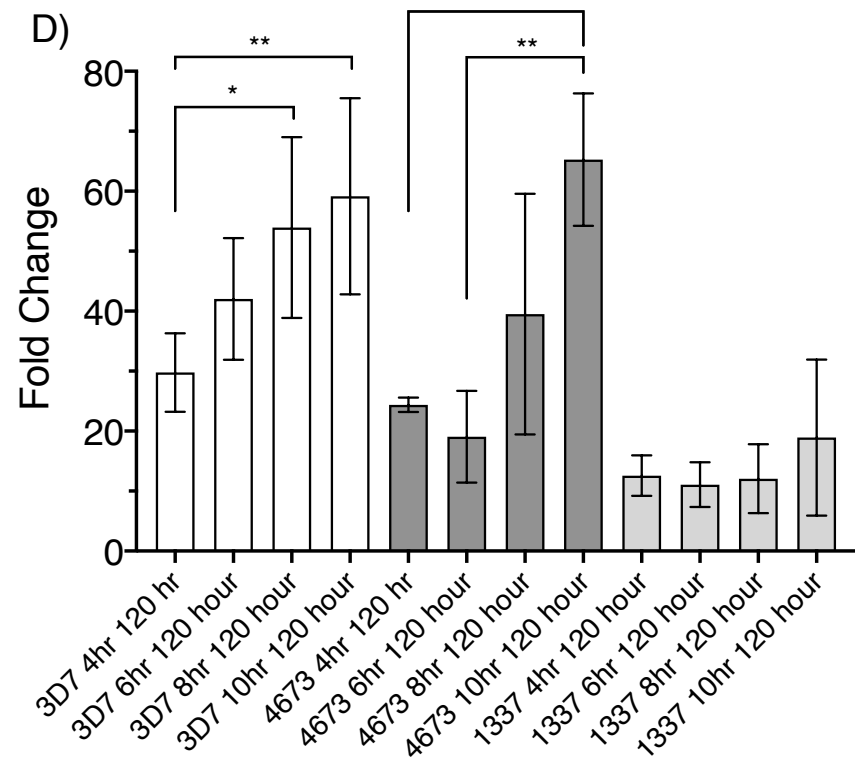

Supplement: MOESM2 [file 17614348]
