# Supplementary material for: The extended recovery ring-stage survival assay provides a superior association with patient clearance half-life and increases throughput
Source: Springer Nature journal article supplement (doi:10.1186/s12936-020-3139-6), 2020-01-31
Supplement: MOESM5 [file 17614348]

| First Author | Year | Number of Isolates | RSA and PC1/2 Correlations | Journal                               | doi                                                                                               |
|--------------|------|--------------------|----------------------------|---------------------------------------|---------------------------------------------------------------------------------------------------|
| Witkowski    | 2013 | 30                 | 0.5476                     | Lancet Infect Dis.                    | 10.1016/S1473-3099(13)70252-4                                                                     |
| Amaratunga   | 2014 | 44                 | 0.48511225                 | Antimicrobial Agents and Chemotherapy | 10.1128/AAC.03055-14                                                                              |
| Ariey        | 2014 | 49                 | NA                         | Nature                                | 10.1038/nature12876                                                                               |
| Wang         | 2015 | 182                | NA                         | Antimicrobial Agents and Chemotherapy | 10.1128/AAC.01255-15                                                                              |
| Ye           | 2016 | 111                | NA                         | Scientific Reports                    | 10.1038/srep20100                                                                                 |
| Boullé       | 2016 | 25                 | NA                         | Emerg Infect Dis.                     | 10.3201/eid2208.160004                                                                            |
| Menard       | 2016 | 64                 | NA                         | Malaria Journal                       | 10.1186/s12936-016-1622-x                                                                         |
| Thanh        | 2017 | 9                  | NA                         | Malaria Journal                       | 10.1186/s12936-017-1680-8                                                                         |
| Mukherjee    | 2017 | 36                 | 0.3534*                    | Malaria Journal                       | <a href="https://doi.org/10.1186/s12936-017-1845-5">https://doi.org/10.1186/s12936-017-1845-5</a> |
| Sá           | 2018 | 22                 | NA                         | PNAS                                  | 10.1073/pnas.1813386115                                                                           |
| Das          | 2019 | 226                | NA                         | Clinical Infectious Diseases          | 10.1093/cid/ciy1038                                                                               |
| Phong        | 2019 | 25                 | NA                         | Malaria Journal                       | 10.1186/s12936-019-2640-2                                                                         |
